# Supplementary material for: Use of Artificial Intelligence to Shorten the Behavioral Diagnosis of Autism
Source: PLOS journal article supplement (doi:10.1371/journal.pone.0043855), 2012-08-27
Supplement: S1 (10.1371/journal.pone.0043855.s001) [file journal.pone.0043855.s001]

### Supplementary Table 1

List of all the excluded questions from the ADI-R. We removed questions from consideration if they contained a majority of exception codes indicating that the question could not be answered in the format requested. We also removed all 'special isolated skills' questions and optional questions with hand-written answers.

| Question Number on ADI-R | Question Code            | Question Subject                                              | Reason for Exclusion                                            |
|--------------------------|--------------------------|---------------------------------------------------------------|-----------------------------------------------------------------|
| 1-CMT                    | concern                  | Current concerns                                              | Comment                                                         |
| 1a-CMT                   | current_concerns_specify | Specific current concerns (examples)                          | Comment                                                         |
| 2                        | acon                     | Onset of symptoms                                             | Too many exclusion #s/can't answer question in format requested |
| 3-CMT                    | fsymc                    | First symptoms to arouse parental concern                     | Comment                                                         |
| 3a-CMT                   | fsymnc_specify           | Specific symptoms to first arouse parental concern (examples) | Comment                                                         |
| 5                        | walk                     | First walked unaided                                          | Too many exclusion #s/can't answer question in format requested |
| 5-CMT                    | walk_cmmt                | First walked unaided comments                                 | Comment                                                         |
| 6                        | drydz                    | Acquisition of bladder control: daytime                       | Too many exclusion #s/can't answer question in format requested |
| 7                        | drynz                    | Acquisition of bladder control: nighttime                     | Too many exclusion #s/can't answer question in format requested |
| 8                        | bowel                    | Acquisition of bowel control                                  | Too many exclusion #s/can't answer question in format requested |
| 8-CMT                    | bowel_cmt                | Acquisition of bowel control comments                         | Comment                                                         |
| 9                        | aword                    | Age of first single words                                     | Too many exclusion #s/can't answer question in format           |

|        |             |                                                                                              |                                                                 |
|--------|-------------|----------------------------------------------------------------------------------------------|-----------------------------------------------------------------|
|        |             |                                                                                              | requested                                                       |
| 9-CMT  | aword_cmt   | Age of first single words comment                                                            | Comment                                                         |
| 10     | aphrase     | Age of first phrases (if ever used)                                                          | Too many exclusion #s/can't answer question in format requested |
| 10-CMT | aphrase_cmt | Age of first phrases (if ever used) comments                                                 | Comment                                                         |
| 11-CMT | loslang_cmt | Loss of language after acquisition comment                                                   | Comment                                                         |
| 12-CMT | levlang_cmt | Level of communicative language before loss comment                                          | Comment                                                         |
| 13-CMT | lossp_cmt   | Loss of spontaneous use of at least five meaningful words comment                            | Comment                                                         |
| 14-CMT | losword_cmt | Loss of communicative intent comment                                                         | Comment                                                         |
| 15-CMT | losssyn_cmt | Loss of syntactical skills (grammar) comment                                                 | Comment                                                         |
| 16-CMT | lossart_cmt | Loss of articulation (pronunciation)                                                         | Comment                                                         |
| 17     | aloslan     | Age when main loss of language skills first apparent                                         | Too many exclusion #s/can't answer question in format requested |
| 17-CMT | aloslan_cmt | Age when main loss of language skills first apparent comment                                 | Comment                                                         |
| 18-CMT | losphys_cmt | Association of loss of language with physical illness comment                                | Comment                                                         |
| 19     | losdurn     | Duration of loss of language skills                                                          | Too many exclusion #s/can't answer question in format requested |
| 19-CMT | losdurn_cmt | Duration of loss of language skills comment                                                  | Comment                                                         |
| 20-CMT | elskil_cmt  | Loss of skills (for at least 3 months) comment                                               | Comment                                                         |
| 21-CMT | elhand_cmt  | Purposive hand movements (ability to grip/hold objects) comment                              | Comment                                                         |
| 22-CMT | elmotr_cmt  | Motor skills (posture, gait, coordination) comment                                           | Comment                                                         |
| 23-CMT | losshlp_cmt | Self-help skills (feeding, dress, using the bathroom etc.) comment                           | Comment                                                         |
| 24-CMT | elplay_cmt  | Constructive or imaginative play (puzzles, games, make-believe etc.) comment                 | Comment                                                         |
| 25-CMT | elsoc_cmt   | Social engagement and responsiveness (social relatedness, interest, and involvement) comment | Comment                                                         |

|                             |             |                                                                                       |                                                                 |
|-----------------------------|-------------|---------------------------------------------------------------------------------------|-----------------------------------------------------------------|
| 26                          | ageloss     | Age when main loss of skill first apparent                                            | Too many exclusion #s/can't answer question in format requested |
| 27-CMT                      | elskph_cmt  | Association of loss of skills with physical illness comment                           | Comment                                                         |
| 28                          | durdet      | Duration of loss of skills                                                            | Too many exclusion #s/can't answer question in format requested |
| 28-CMT                      | durdet_cmt  | Duration of loss of skills comment                                                    | Comment                                                         |
| 36-CMT                      | inappq_cmt  | Inappropriate questions or statements comment                                         | Comment                                                         |
| 37-CMT                      | pron_cmt    | Pronominal reversal comment                                                           | Comment                                                         |
| 38-CMT                      | neoid_cmt   | Neologisms/idiosyncratic language comment                                             | Comment                                                         |
| 39-CMT                      | verrit_cmt  | Verbal rituals comments                                                               | Comment                                                         |
| 40-CMT                      | inr_cmt     | Intonation/volume/rhythm/rate comment                                                 | Comment                                                         |
| 41-CMT                      | speech_cmt  | Current communicative speech comment                                                  | Comment                                                         |
| 43-CMT                      | nod_cmt     | Nodding comment                                                                       | Comment                                                         |
| 44-CMT                      | hshake_cmt  | Head shaking comment                                                                  | Comment                                                         |
| 46-CMT                      | attinst_cmt | Attention to voice comment                                                            | Comment                                                         |
| 47-CMT                      | imit_cmt    | Spontaneous imitation of actions comment                                              | Comment                                                         |
| 57-CMT                      | rfacex_cmt  | Range of facial expressions used to communicate comment                               | Comment                                                         |
| 58-CMT                      | einapf_cmt  | Inappropriate facial expressions comment                                              | Comment                                                         |
| No assigned question number | favtoycmt   | Favorite activities/toys                                                              | Comment                                                         |
| 87                          | judgage     | Interviewer's judgment on age when developmental abnormalities probably first evident | Not multiple choice                                             |
| 88                          | cvisspz     | Current visuospatial ability (in puzzles, jigsaws, shapes, patterns, etc.)            | Low response                                                    |
| 88a                         | evisspz     | Visuospatial ability ever (in puzzles, jigsaws, shapes, patterns, etc.)               | Low response                                                    |
| 89                          | cmemz       | Current memory skill (accurate memory for detail, as of dates or timetables)          | Low response                                                    |
| 89a                         | ememz       | Memory skill ever (accurate memory for detail, as of dates or timetables)             | Low response                                                    |
| 90                          | cmusicz     | Current musical ability (recognition, composition, absolute pitch, or                 | Low response                                                    |

|     |         |                                                                                   |              |
|-----|---------|-----------------------------------------------------------------------------------|--------------|
|     |         | performance)                                                                      |              |
| 90a | emusicz | Musical ability ever (recognition, composition, absolute pitch, or performance)   | Low response |
| 91  | cdrawz  | Current drawing skill (unusually skilled use of perspective or creative approach) | Low response |
| 91a | edrawz  | Drawing skill ever (unusually skilled use of perspective or creative approach)    | Low response |
| 92  | creadz  | Current reading ability (e.g., early sight reading)                               | Low response |
| 92a | ereadz  | Reading ability ever (e.g., early sight reading)                                  | Low response |
| 93  | ccompuz | Current computational ability (e.g., mental arithmetic)                           | Low response |
| 93a | ecompuz | Computational ability ever (e.g., mental arithmetic)                              | Low response |
